# Supplementary material for: Chitosan nanoparticle carrier based on surface molecularly imprinted polymers for the recognition and separation of proteins
Source: Royal Society of Chemistry journal article supplement (doi:10.1039/c5ra14088a), 2015-01-01
Supplement: c5ra14088a1.pdf [file c5ra14088a1.pdf]

Figure S1 The result of SDS-PAGE analysis.

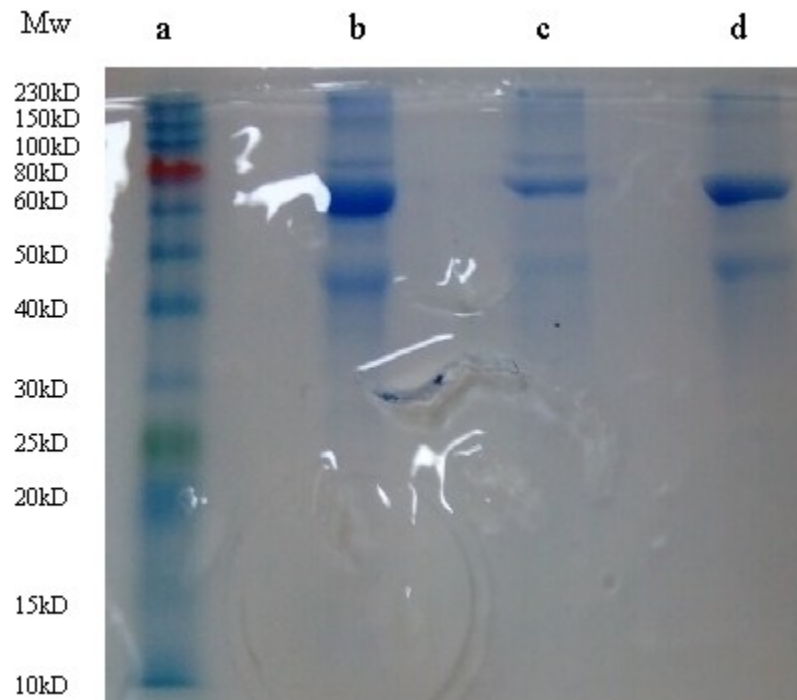

Figure S1 The result of SDS-PAGE analysis.

a, 10 uL of protein molecular weight marker; b, 10 uL of protein mixture solution containing BSA and Ova (each with a concentration of 1.0 mg/mL ); c, 10 uL of mixture solution after adsorption by the MIP; d, 10 uL of the mixture solution after adsorption by the NIP.
